# Supplementary material for: Complex genetic admixture histories reconstructed with Approximate Bayesian Computation
Source: PubMed Central journal article supplement — Mol Ecol Resour. 2021 Feb 26;21(4):1098–117. doi: 10.1111/1755-0998.13325 (PMC8247995; doi:10.1111/1755-0998.13325), 2021-02-26
Supplement: MEN-21-1098-s002.pdf [file MEN-21-1098-s002.pdf]

## Supplemental Note S2 for:

### Complex genetic admixture histories reconstructed with Approximate Bayesian Computation

Cesar A. Fortes-Lima<sup>1,2,\*</sup> | Romain Laurent<sup>1,\*</sup> | Valentin Thouzeau<sup>3,4</sup> | Bruno Toupance<sup>1</sup> | Paul Verdu<sup>1,‡</sup>

<sup>1</sup> CNRS, Muséum National d'Histoire Naturelle, Université de Paris, UMR7206 Eco-anthropologie, Paris, France

<sup>2</sup> Sub-department of Human Evolution, Department of Organismal Biology, Evolutionary Biology Centre, Uppsala University, Uppsala, Sweden

<sup>3</sup> CNRS, Université Paris-Dauphine, PSL University, UMR 7534 Centre de Recherche en Mathématiques de la Décision, Paris, France

<sup>4</sup> ENS, PSL University, EHESS, CNRS, Laboratoire de Sciences Cognitives et Psycholinguistique, Département d'Etudes Cognitives, Paris, France

\* Joint first authors

‡ Author for correspondence: Paul Verdu,

CNRS, Muséum National d'Histoire Naturelle, Université de Paris;

UMR7206 Eco-anthropologie (EA);

Address: Musée de l'Homme, 17, place du Trocadéro, 75016 Paris, France;

email: paul.verdu@mnhn.fr; tel: +33 1 44 05 73 17

#### KEYWORDS

Admixture; Approximate Bayesian Computation; Inference; Population Genetics; Machine Learning

# MOLECULAR ECOLOGY RESOURCES

We used the rectangular hyperbola class of functions to obtain increasing/decreasing patterns using only one shape parameter. We give here the derivation of the equations used, giving the example of a decreasing pattern.

A decreasing hyperbola is given by the function:

$$f(x) = \frac{a(1-x)}{a+x} \quad (\text{S2.1})$$

with  $x \in [0; 1]$ ,  $f(x) \in [0; 1]$  and  $a \in [0; +\infty[$ . Parameter  $a$  controls the shape (“steepness”) of the curve obtained (figure S2.1).

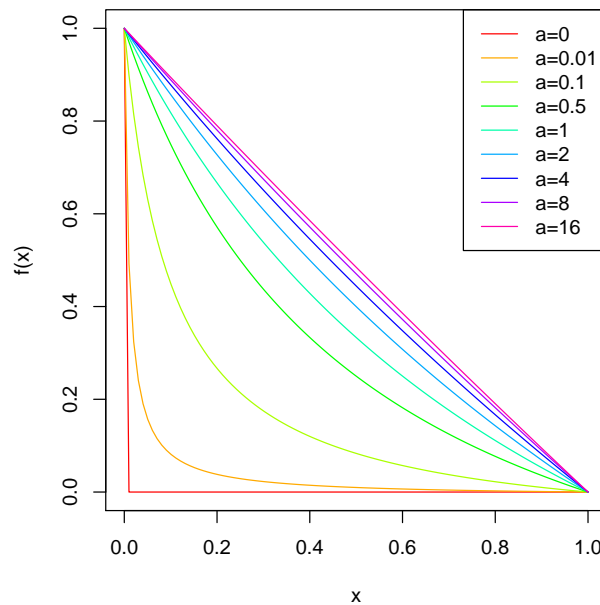

Figure S2.1: Influence of  $a$  on equation S2.1

The intersection between the hyperbola and  $y = x$  is given by

$$x = y = -a + \sqrt{a + a^2}$$

thus, we can sample an uniform deviate  $u \in [0; \frac{1}{2}]$  and set parameter  $a$ :

$$a = \frac{u^2}{1 - 2u}$$

to obtain all hyperbola shapes.

We then transformed equation S2.1 to rescale the ranges of  $x$  and  $f(x)$ :

$$f(x) = \frac{a(y_{max} - y_{min}) \left(1 - \frac{x - x_{min}}{x_{max} - x_{min}}\right)}{a + \frac{x - x_{min}}{x_{max} - x_{min}}} + y_{min} \quad (\text{S2.2})$$

with  $x \in [x_{min}; x_{max}]$  and  $f(x) \in [y_{min}; y_{max}]$  (figure S2.2).

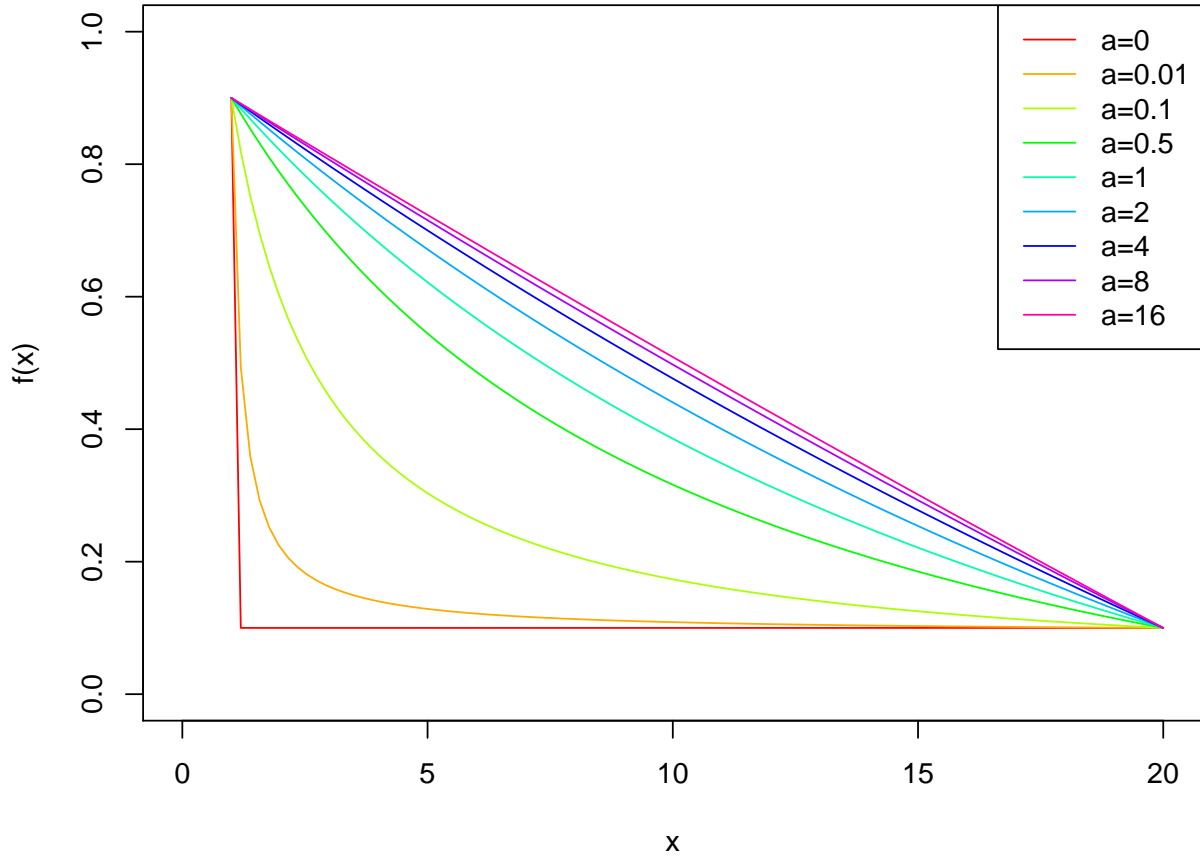

Figure S2.2: Influence of  $a$  on equation S2.2 with  $x_{min} = 1$ ,  $x_{max} = 20$ ,  $y_{min} = 0.1$  and  $y_{max} = 0.9$

With the notation used in the main text for contributions, and considering 20 generations of admixture, we obtain:

$$s_{S,g} = \frac{a(s_{S,1} - s_{S,20})\left(1 - \frac{g-1}{20-1}\right)}{a + \frac{g-1}{20-1}} + s_{S,20} \quad (\text{S2.3})$$

and an example of the patterns obtained for different  $u$  values is given in figure S2.3.

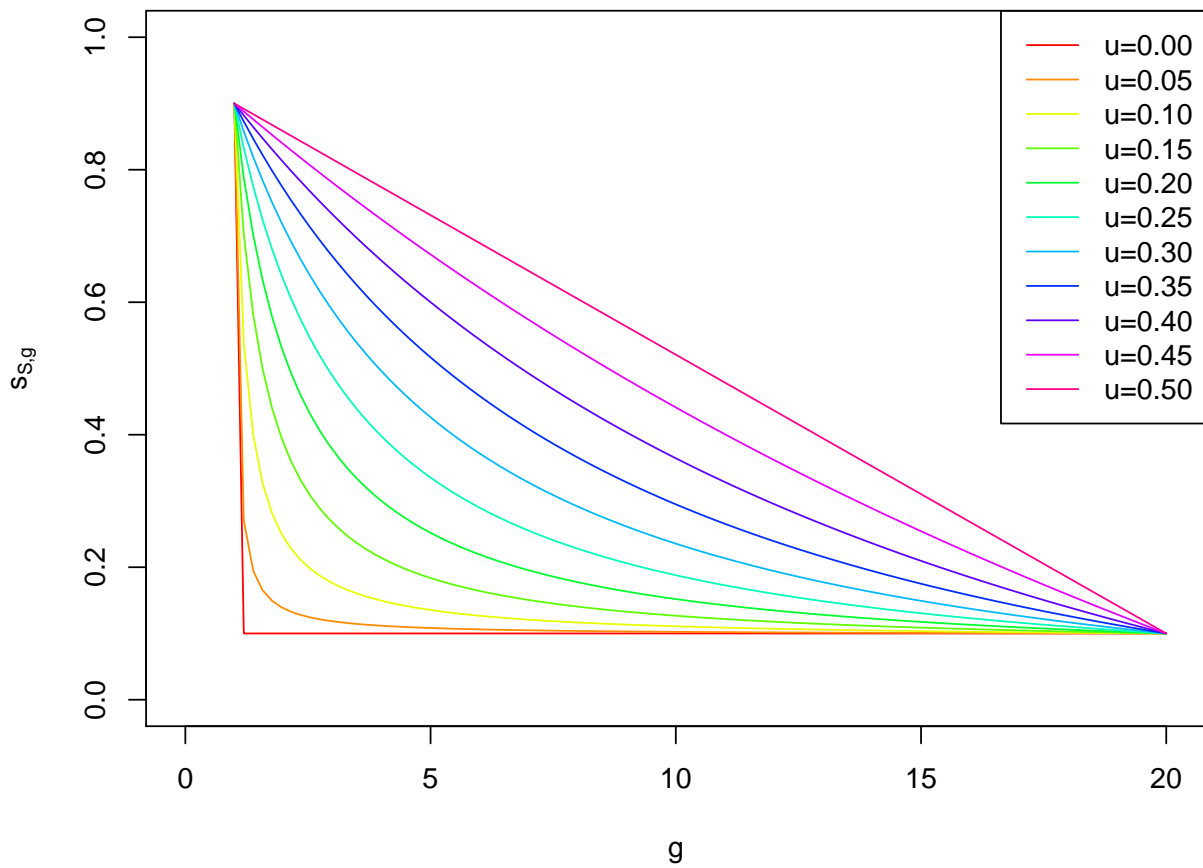

Figure S2.3: Influence of  $u$  on equation S2.3 with  $s_{S,20} = 0.1$  and  $s_{S,1} = 0.9$
